# Supplementary material for: Carbamoylmannose enhances the tumor targeting ability of supramolecular nanoparticles formed through host–guest complexation of a pair of homopolymers
Source: Royal Society of Chemistry journal article supplement (doi:10.1039/c6tb02863b), 2016-12-24
Supplement: c6tb02863b1.pdf [file c6tb02863b1.pdf]

Electronic Supplementary Information

## **Carbamoylmannose Enhances Tumor Targeting of Supramolecular Nanoparticles Formed through Host-Guest Complexation of a Pair of Homopolymers**

Xikuang Yao,<sup>a</sup> Qiwen Zhu,<sup>b</sup> Cheng Li,<sup>a</sup> Kangjun Yuan,<sup>a</sup> Rui Che,<sup>b</sup> Peng Zhang,<sup>a</sup> Chenchen Yang,<sup>a</sup> Wei Lu,<sup>\*b</sup> Wei Wu,<sup>a</sup> Xiqun Jiang,<sup>\*a</sup>

<sup>a</sup> Department of Polymer Science & Engineering, College of Chemistry & Chemical Engineering,  
Nanjing University, Nanjing 210093, P. R. China

<sup>b</sup> School of Chemistry and Molecular Engineering, East China Normal University, 3663 North  
Zhongshan Road, Shanghai 200062, P. R. China

\* To whom correspondence should be addressed

Tel/Fax: 86 25 89687138

Email: [jiangx@nju.edu.cn](mailto:jiangx@nju.edu.cn), [wlu@chem.ecnu.edu.cn](mailto:wlu@chem.ecnu.edu.cn)

### 3-O-carbamoyl-2-propynyl-2,4,6-tris-O-acetyl- $\alpha$ -D-mannopyranoside

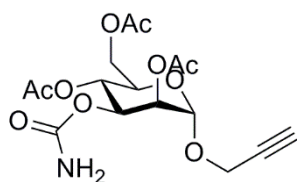

Into a solution of 1,2,4,6-tetra-O-acetyl-3-O-carbamoyl- $\alpha$ -D-mannopyranoside (1.5 g, 3.8 mmol) and propargyl alcohol (1.15 mL, 19.2 mmol) in 20 mL of anhydrous DCM was added  $\text{BF}_3 \cdot \text{Et}_2\text{O}$  (4.74 mL, 38.4 mmol) dropwise at 0 °C under nitrogen. The mixture was stirring at 0-20 °C for 24 h. The reaction was quenched with saturated aqueous  $\text{NaHCO}_3$  at 0 °C, and the mixture was extracted with DCM. The organic layer was washed subsequently with water, saturated aqueous  $\text{Na}_2\text{CO}_3$ , and brine, dried by  $\text{Na}_2\text{SO}_4$  and concentrated. The crude product was purified by silica gel column chromatography (EtOAc/petroleum ether 2:1) to yield 3-O-carbamoyl-2-propynyl-2,4,6-tris-O-acetyl- $\alpha$ -D-mannopyranoside as a white solid (0.74 g, 50.2%).  $[\alpha]_D^{25} +56$  (0.1,  $\text{CHCl}_3$ ), m.p. 110.5-112.5 °C (Optical rotations were measured at 25 °C using a Rudolph Autopol VI.).  $^1\text{H}$  and  $^{13}\text{C}$  spectra were recorded on a Bruker Ascend400 (400 MHz and 100 MHz). High-resolution mass spectral analyses were run on a microTOF 10293.

$^1\text{H}$  NMR (400 MHz,  $\text{CDCl}_3$ )  $\delta$  5.35 – 5.20 (m, 3H), 5.05 (s, 1H), 4.85 (s, 2H), 4.29 (dd,  $J = 14.1, 3.7$  Hz, 3H), 4.11 (dd,  $J = 12.3, 2.2$  Hz, 1H), 4.06 – 4.00 (m, 1H), 2.49 (t,  $J = 2.2$  Hz, 1H), 2.16 (s, 3H), 2.11 (s, 3H), 2.07 (s, 3H);

$^{13}\text{C}$  NMR (101 MHz,  $\text{CDCl}_3$ )  $\delta$  170.66, 169.94, 169.92, 155.27, 96.26, 77.98, 77.38, 77.06, 76.75, 75.59, 69.85, 69.01, 66.16, 62.35, 55.01, 20.91, 20.75;

HR-MS  $m/z$ : 410.1058, (calculated for  $\text{C}_{16}\text{H}_{21}\text{NNaO}_{10}$ , 410.1058).

### 2-propynyl-3-O-carbamoyl-D-mannose (PCM)

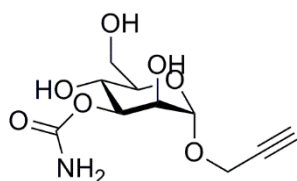

To a cooled (0 °C) solution of 3-O-carbamoyl-2-propynyl-2,4,6-tris-O-acetyl- $\alpha$ -D-mannopyranoside (584 mg, 1.5 mmol) in 12 mL of anhydrous MeOH was added  $\text{K}_2\text{CO}_3$  (30 mg, 0.2 mmol) in portion. The mixture was reacted at 0 °C for 3 h. The solution was then neutralized by addition of iron-exchange resin until pH 7, filtered and concentrated. The crude product was purified by silica gel column chromatography (0% - 5% MeOH:  $\text{CH}_2\text{Cl}_2$ ) to yield PCM as a white solid (340 mg, 86.5%).  $[\alpha]_D^{25} +79$  (0.122, MeOH), m.p. 146-148 °C.

$^1\text{H}$  NMR (400 MHz, MeOD)  $\delta$  4.99 (s, 1H), 4.83 (dd,  $J = 9.9, 3.2$  Hz, 1H), 4.31 (d,  $J = 2.2$  Hz, 2H), 4.00 (s, 1H), 3.91 – 3.80 (m, 2H), 3.74 (dd,  $J = 11.7, 5.7$  Hz, 1H), 3.66 – 3.58 (m, 1H), 2.88 (d,  $J = 2.2$  Hz, 1H).

$^{13}\text{C}$  NMR (101 MHz, MeOD)  $\delta$  159.37, 99.74, 79.89, 76.14, 75.90, 75.28, 70.15, 65.97, 62.64, 54.90, 49.67, 49.45, 49.24, 49.03, 48.82, 48.60, 48.39.

HR-MS  $m/z$ : 284.0728, (calculated for  $\text{C}_{10}\text{H}_{15}\text{NNaO}_7$ , 284.0741).

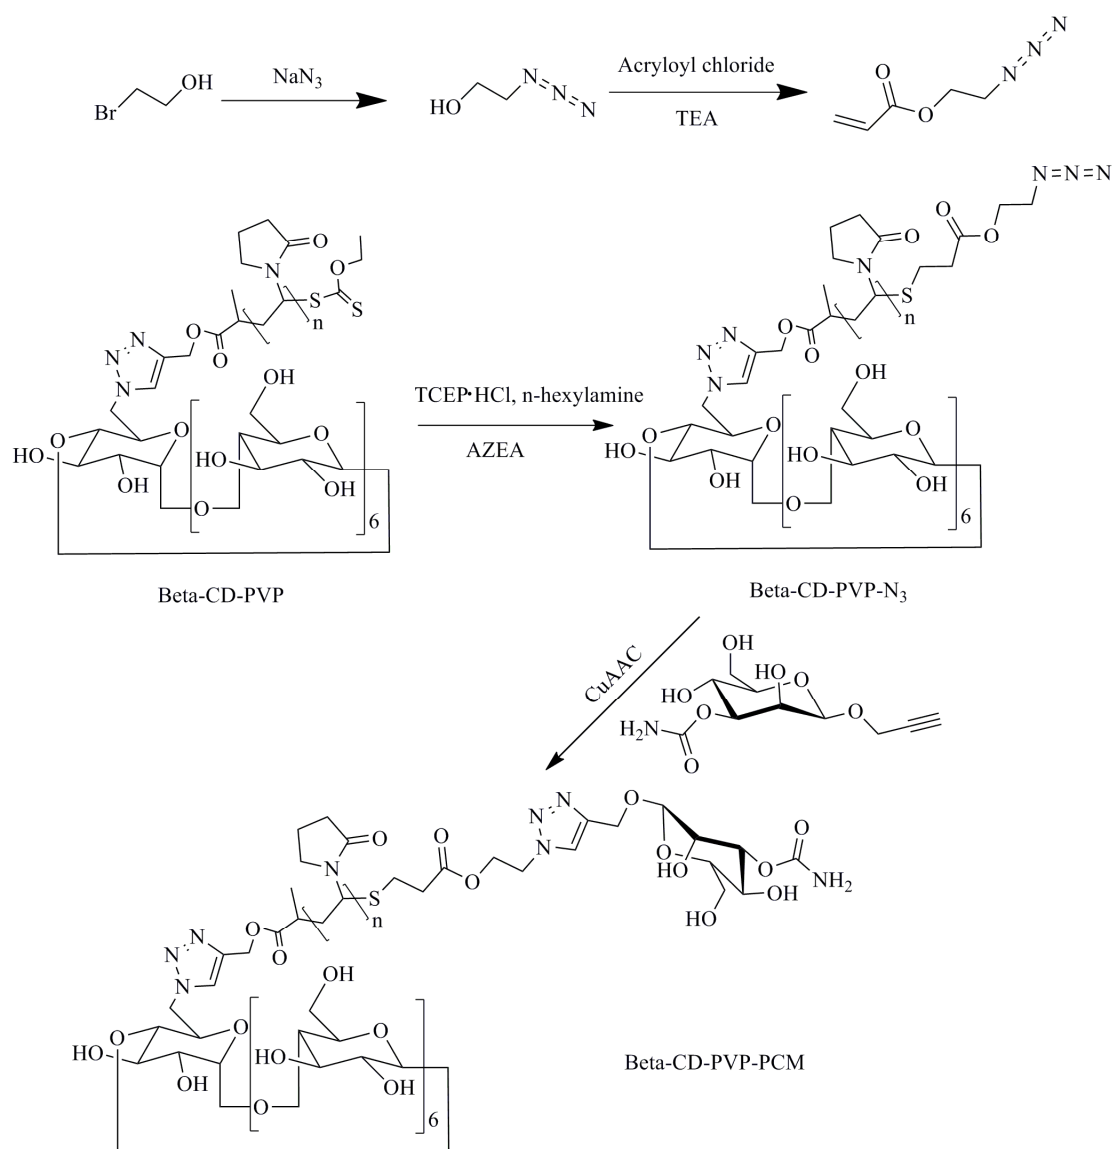

**Scheme S1.** The synthesis route of  $\beta$ -CD-PVP-PCM.

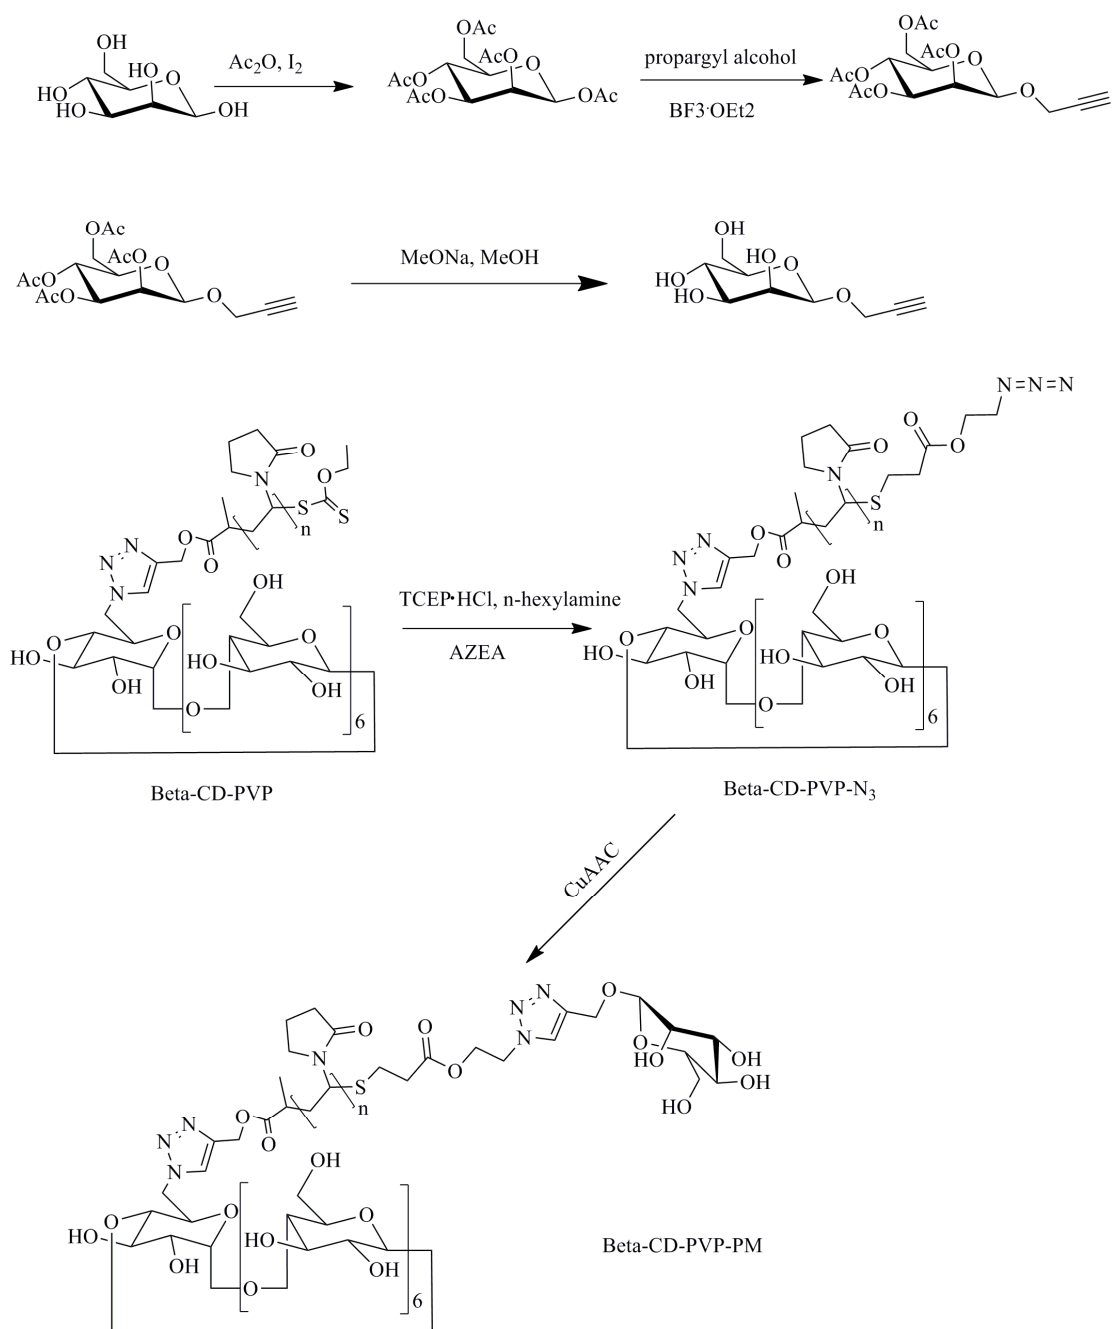

**Scheme S2.** The synthesis route of  $\beta$ -CD-PVP-PM.



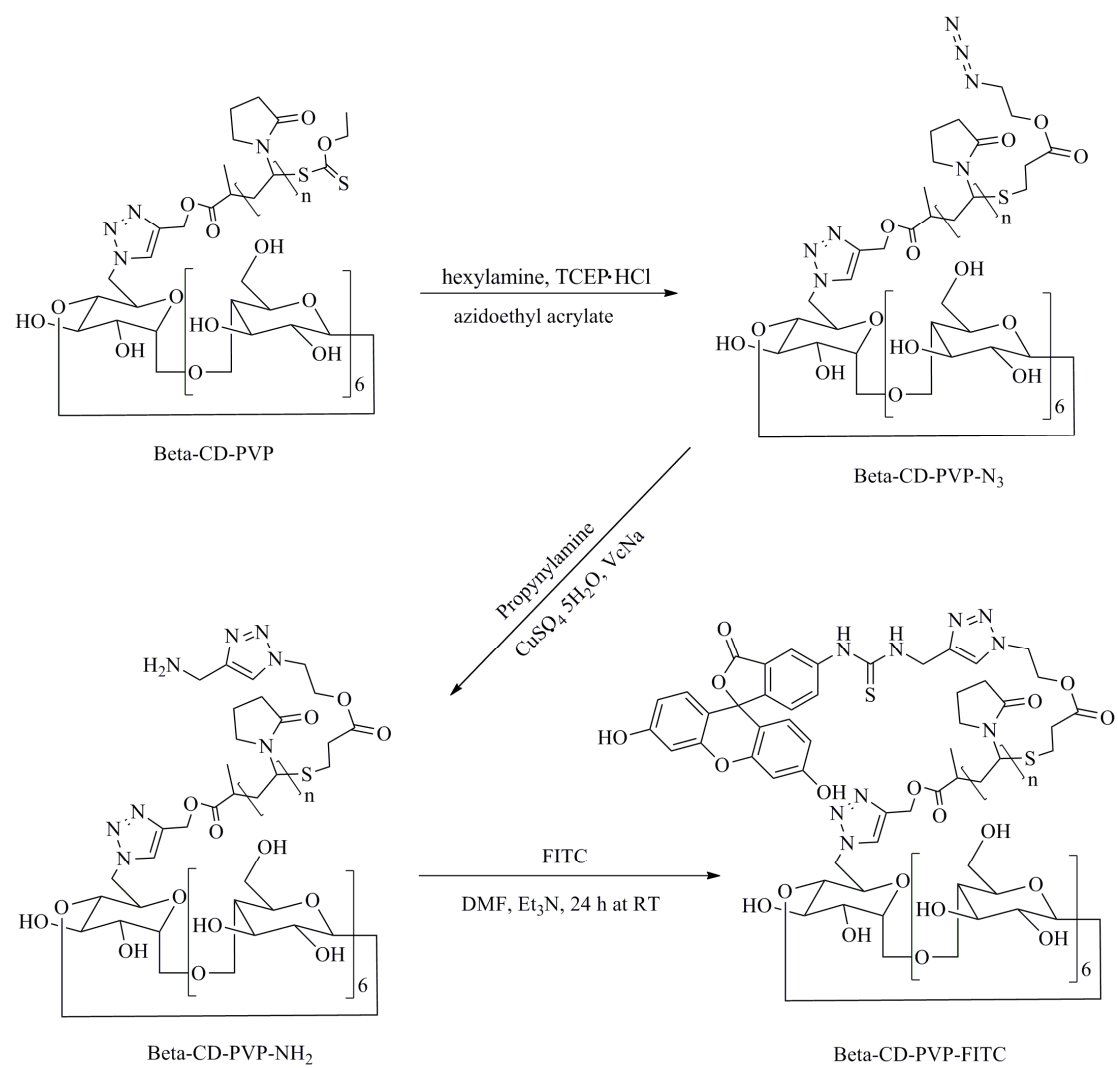

**Scheme S3.** The synthesis route of FITC-labeled  $\beta$ -CD-PVP.

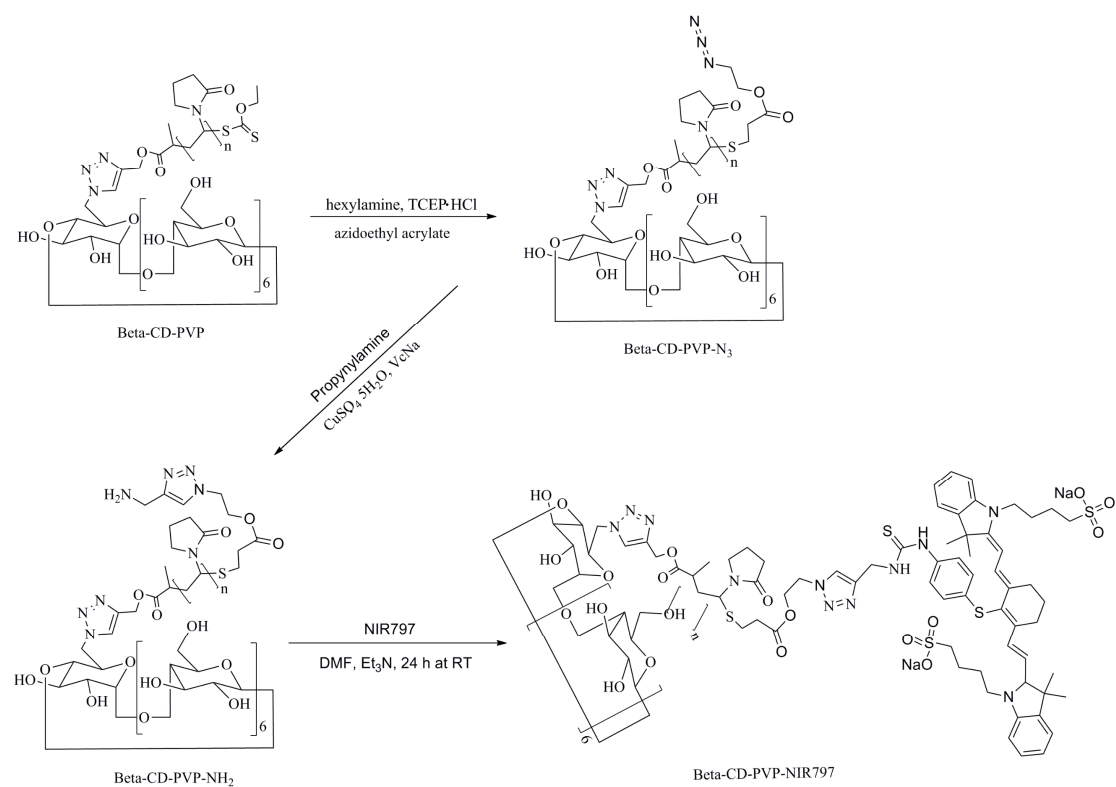

**Scheme S4.** The synthesis route of NIR797-labeled  $\beta$ -CD-PVP.

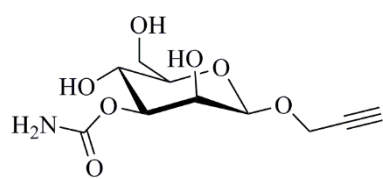

2-propargyl-3-O-carbamoyl-D-mannose  
(PCM)

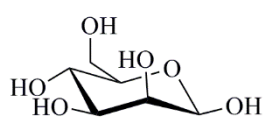

D-mannose

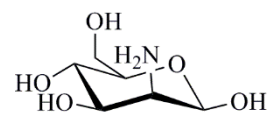

D-mannosamine (MA)

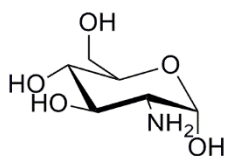

D-glucosamine (GA)

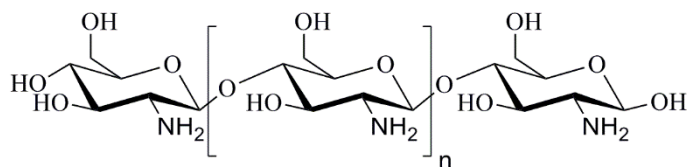

Chitosan

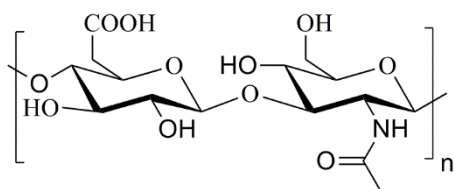

Hyaluronic Acid (HA)

**Scheme S5.** The structure of used various monosaccharides and polysaccharides.

**Table S1.** The characteristics of these platinum-incorporating nanoparticles.

| No. | Formation       | Diameter<br>(nm) | PDI  | Zeta-potential<br>(mv) | Drug<br>Loading<br>Content<br>(DLC) | Drug<br>Encapsulation<br>Efficiency (DEE) |
|-----|-----------------|------------------|------|------------------------|-------------------------------------|-------------------------------------------|
| 1   | PVPA-Pt NPs     | 65               | 0.16 | -13.11 $\pm$ 2.31      | 39%                                 | 52%                                       |
| 2   | PM-PVPA-Pt NPs  | 63               | 0.19 | -15.46 $\pm$ 1.75      | 42%                                 | 56%                                       |
| 3   | PCM-PVPA-Pt NPs | 66               | 0.18 | -14.15 $\pm$ 3.21      | 41%                                 | 55%                                       |

**Table S2.** The IC<sub>50</sub> values of different formations after incubated with three various cancer cells for 48 h.

| No. | Cells   | IC <sub>50</sub> (μg/mL) |             |                |                 |
|-----|---------|--------------------------|-------------|----------------|-----------------|
|     |         | Free CDDP                | PVPA-Pt NPs | PM-PVPA-Pt NPs | PCM-PVPA-Pt NPs |
| 1   | A549    | 25.1                     | 50.1        | 46.8           | 40.7            |
| 2   | SH-SY5Y | 26.9                     | 37.2        | 36.3           | 32.4            |
| 3   | H22     | 1.9                      | 30.9        | 17.0           | 12.0            |

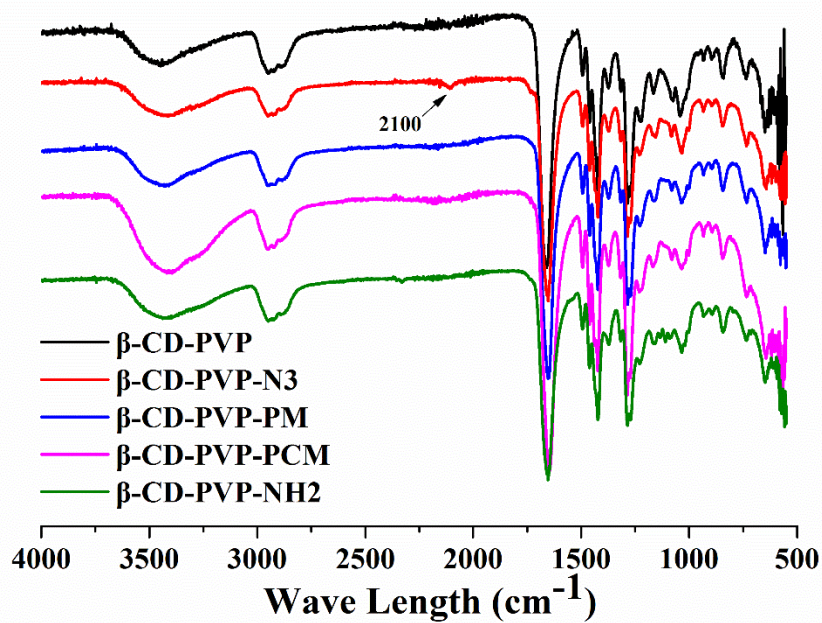

**Figure S1.** The FT-IR spectra of various  $\beta$ -CD-PVP polymers.

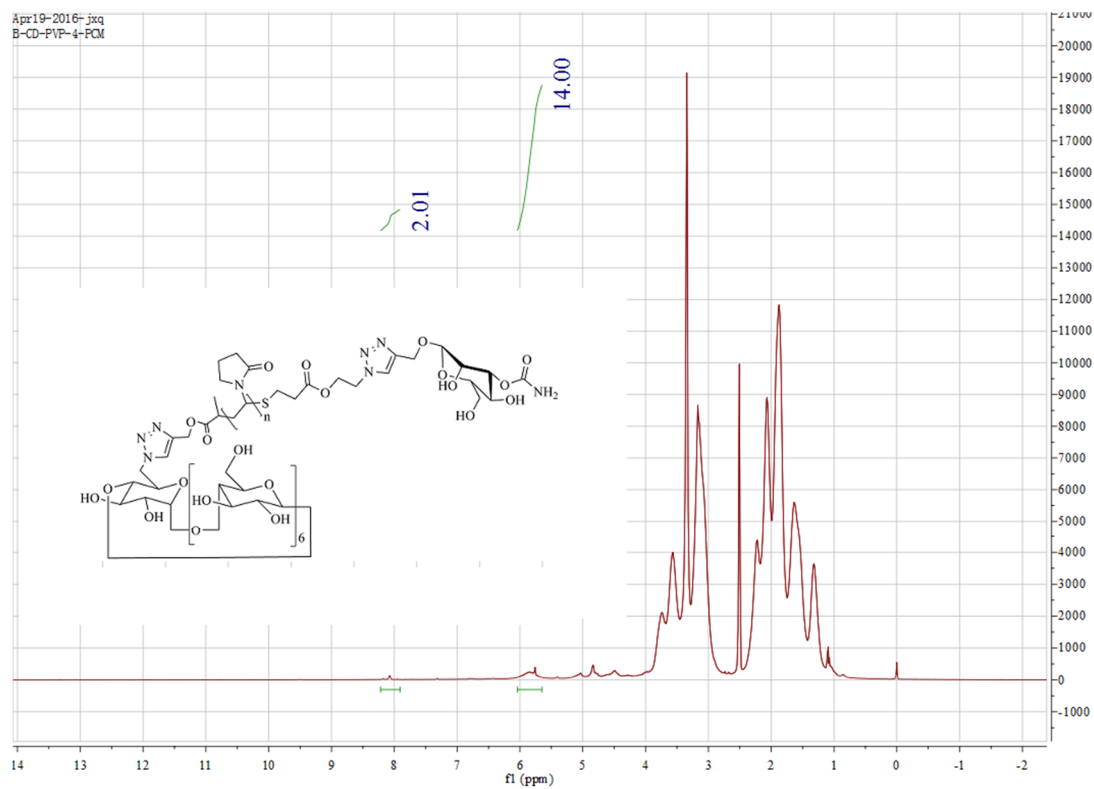

**Figure S2.** The  $^1\text{H}$  NMR spectrum of  $\beta$ -CD-PVP-PCM (solvent:  $\text{DMSO-d}_6$ ).

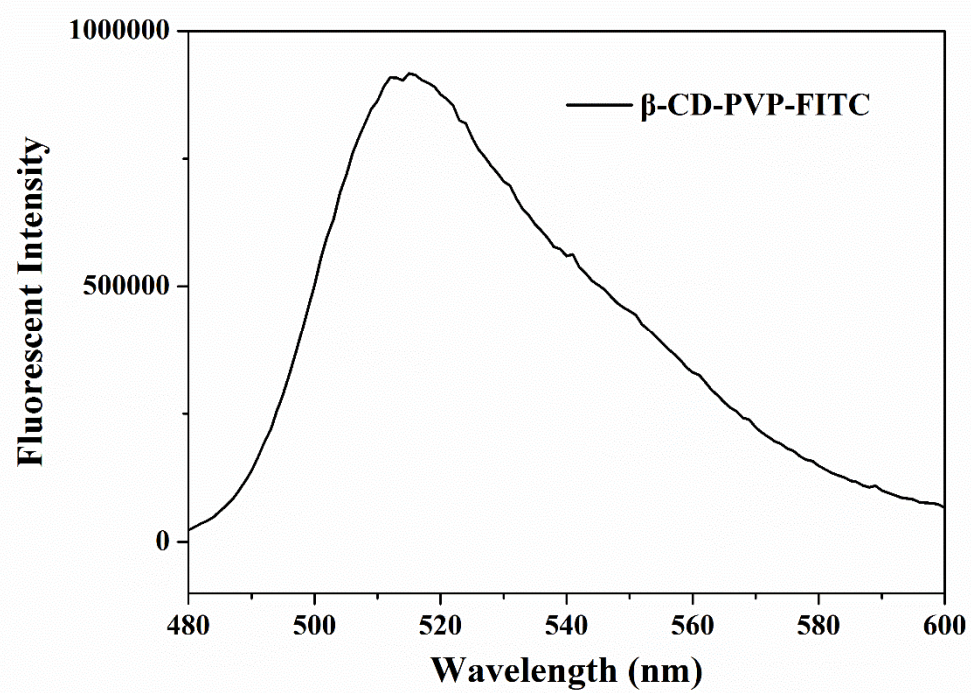

**Figure S3.** The fluorescent spectrum of  $\beta$ -CD-PVP-FITC. Excitation: 450 nm.



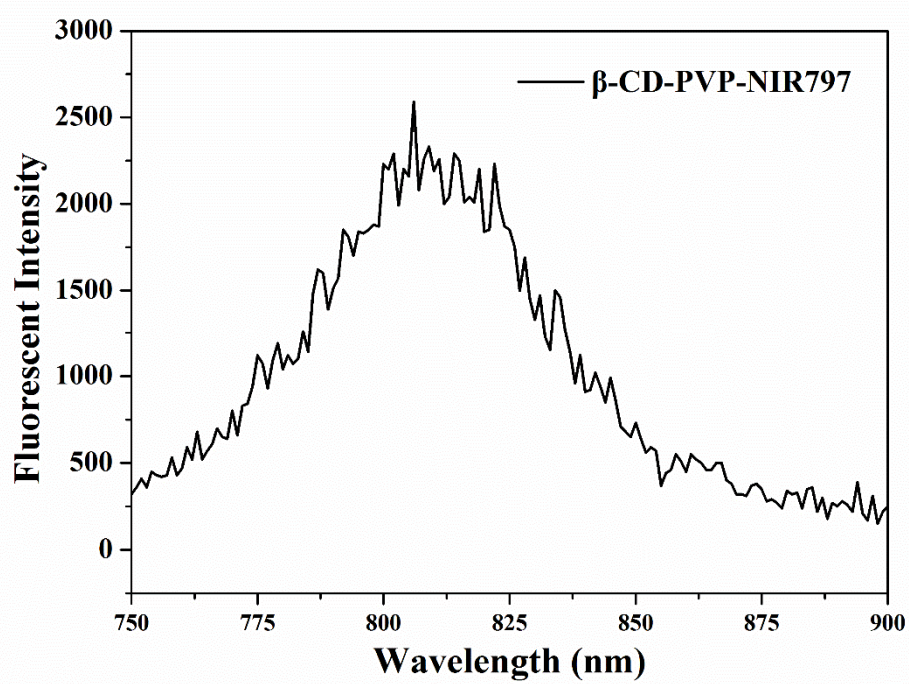

**Figure S4.** The fluorescent spectrum of  $\beta$ -CD-PVP-NIR797. Excitation: 704 nm.

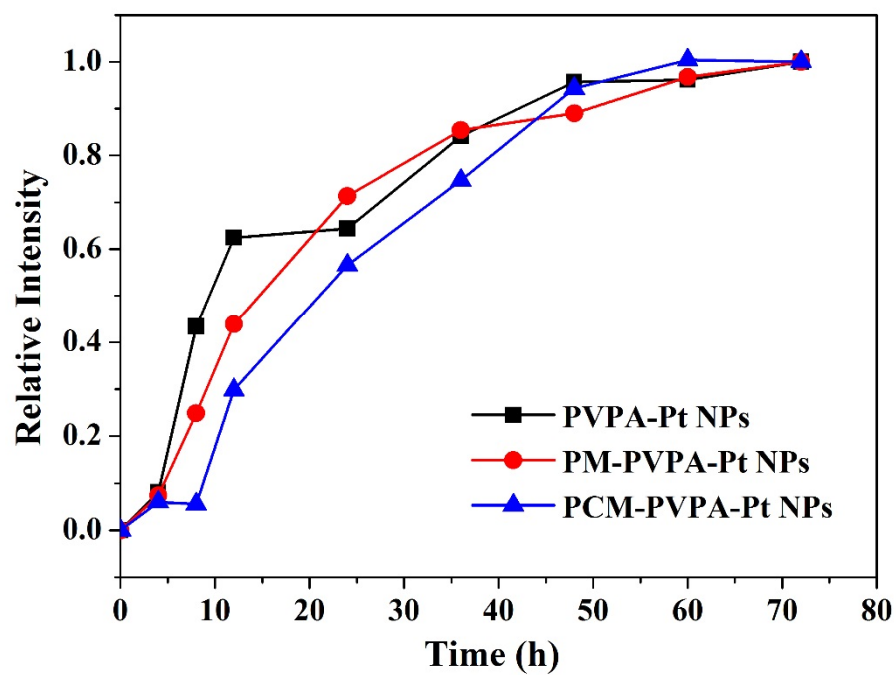

**Figure S5.** The relative DLS intensity curves of these platinum-incorporating nanoparticles during the preparation.

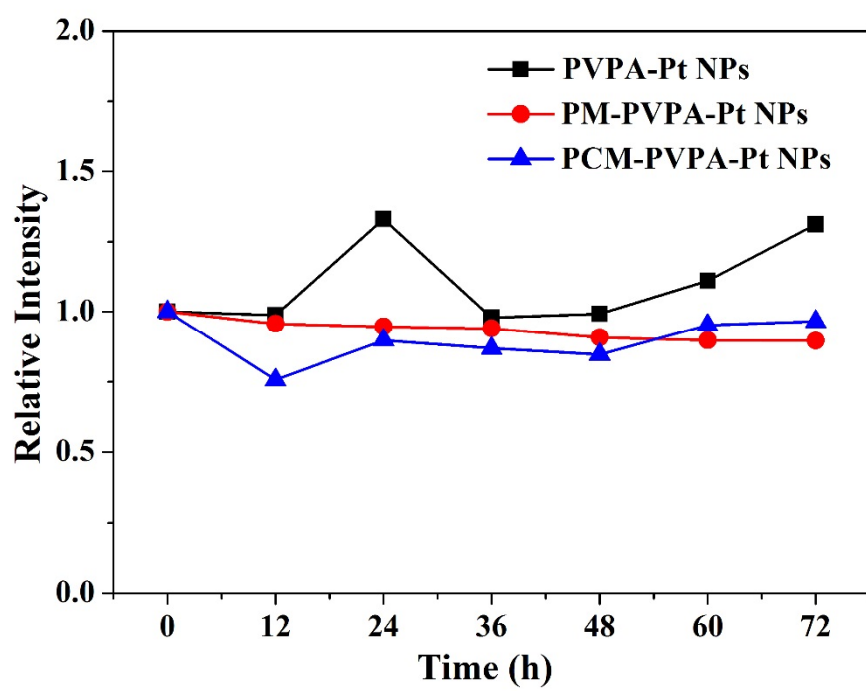

**Figure S6.** The relative DLS intensity of these platinum-incorporating nanoparticles in deionized water at 37 °C.

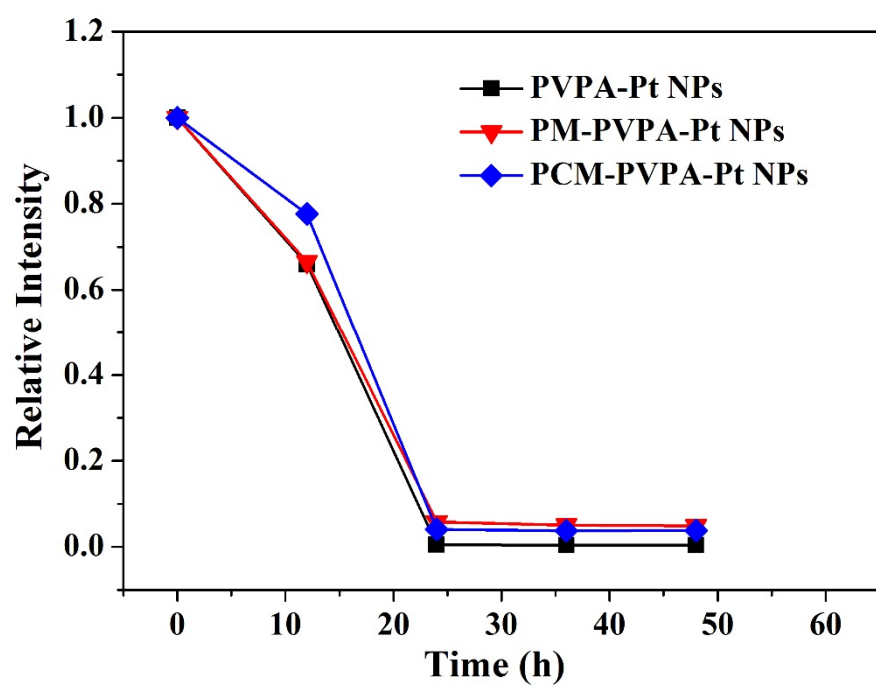

**Figure S7.** The dissociation behaviours of these platinum-incorporating nanoparticles in 10 mM PBS containing 150 mM NaCl.

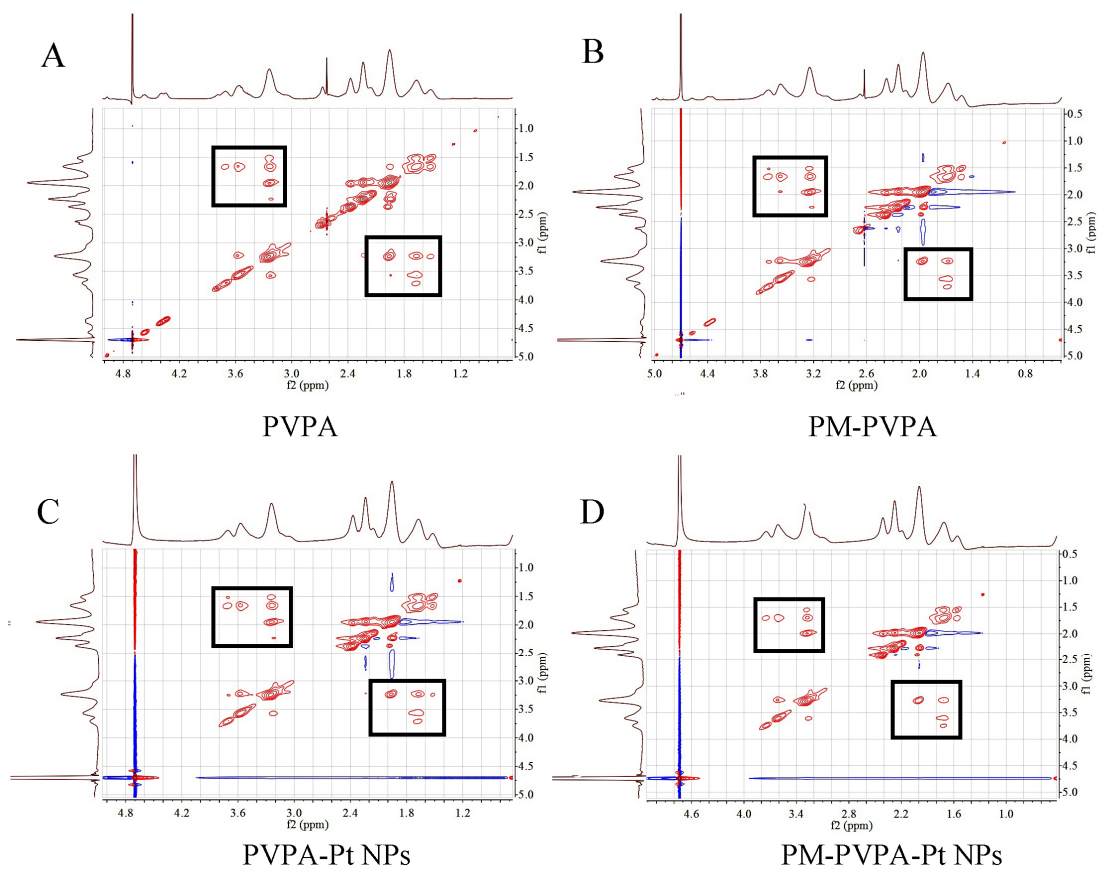

**Figure S8.** The 2D NOESY spectra of PVPA (A), PM-PVAP (B), PVPA-Pt NPs (C), and PM-PVPA-Pt NPs (D), respectively (solvent: D<sub>2</sub>O).

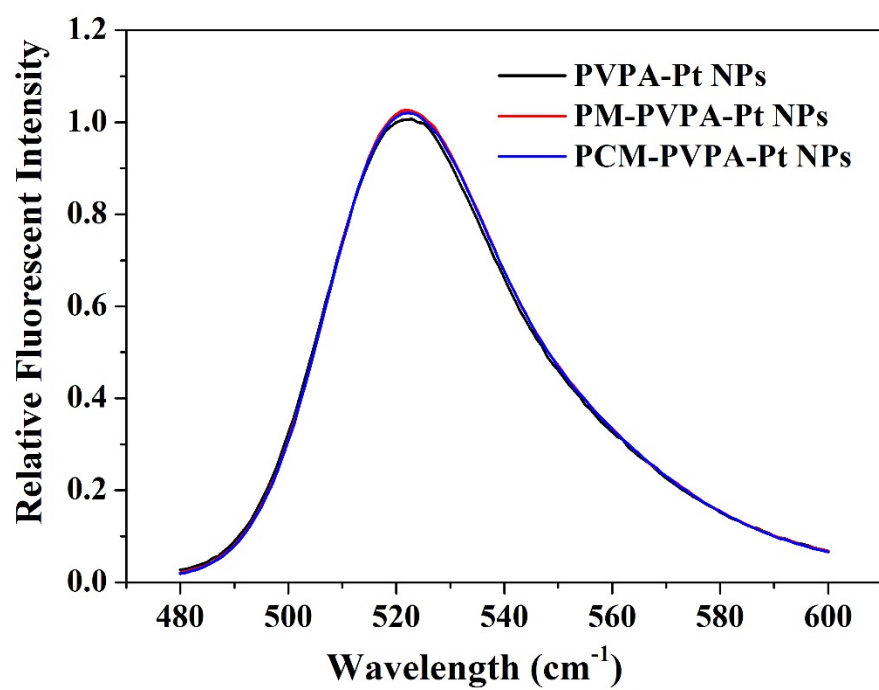

**Figure S9.** The relative FITC fluorescent intensity of these platinum-incorporating nanoparticles. Excitation: 450 nm.

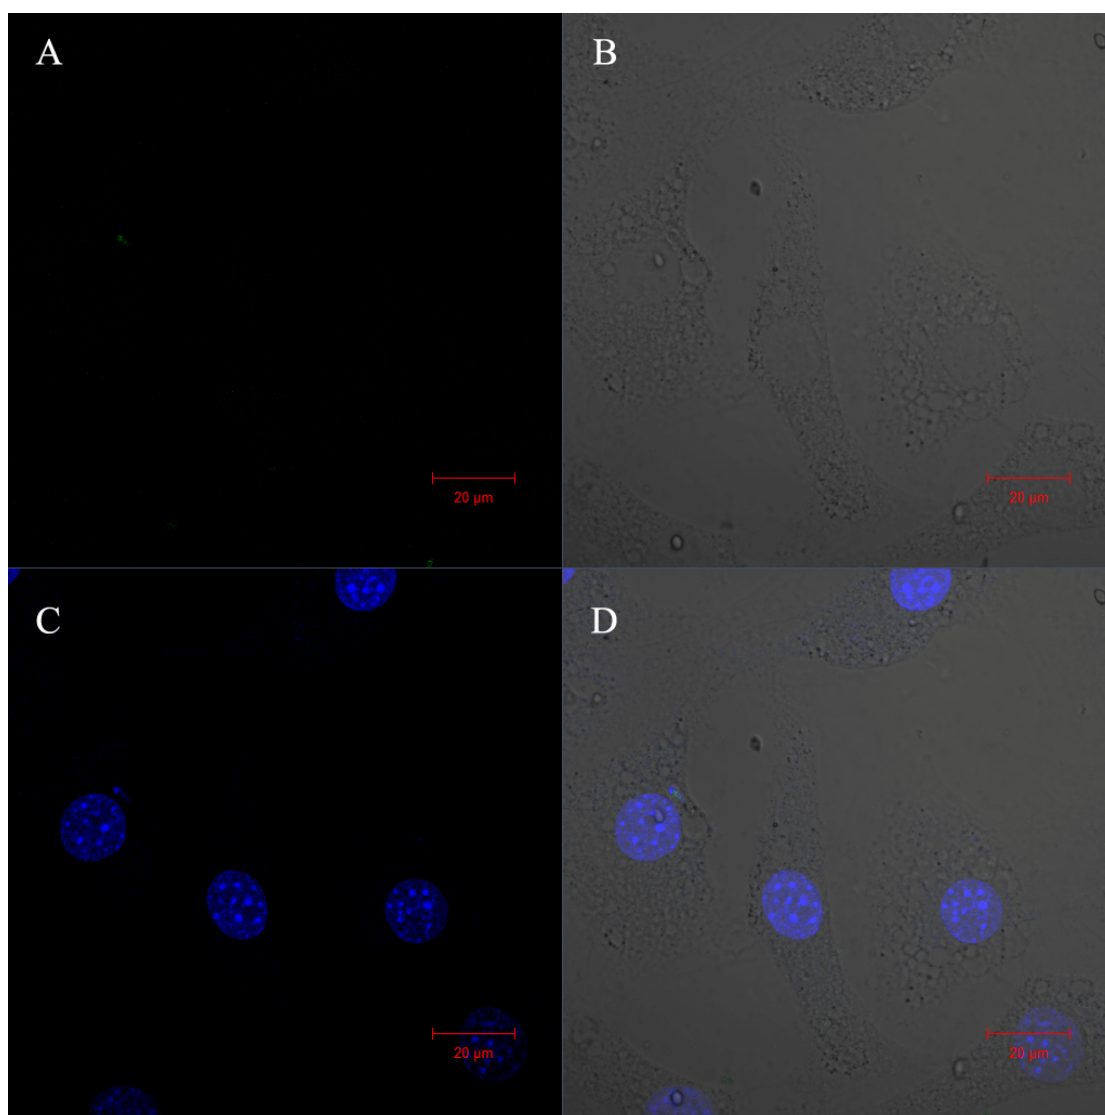

**Figure S10.** The CLSM images of NIH3T3 cells after incubated with FITC-labeled PCM-PVPA-Pt NPs at 37 °C for 4 h.

(A) is the FITC channel, (B) is the bright field, (C) is the Hoechst 33258 channel, and (D) is the merged image.

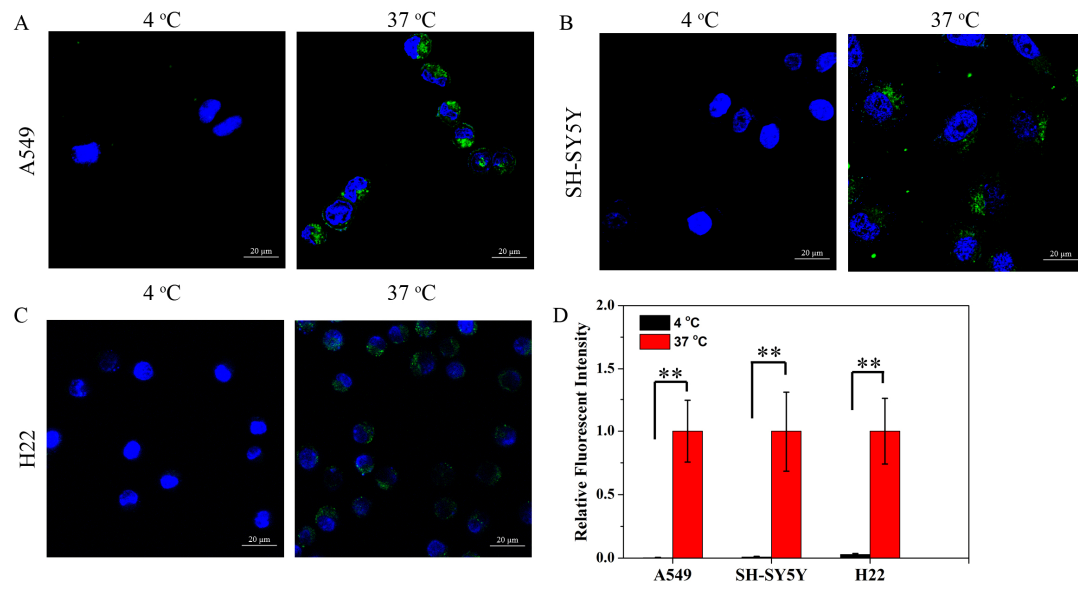

**Figure S11.** The CLSM images of A549 cells (A), SH-SY5Y cells (B) and H22 cells (C) after treated with PCM-PVPA-Pt NPs at 4 °C or 37 °C for 4 h. (D) Quantitative data for the relative fluorescent intensity. (n = 10 in at least three different CLSM images, \*\* represents  $P < 0.01$ )



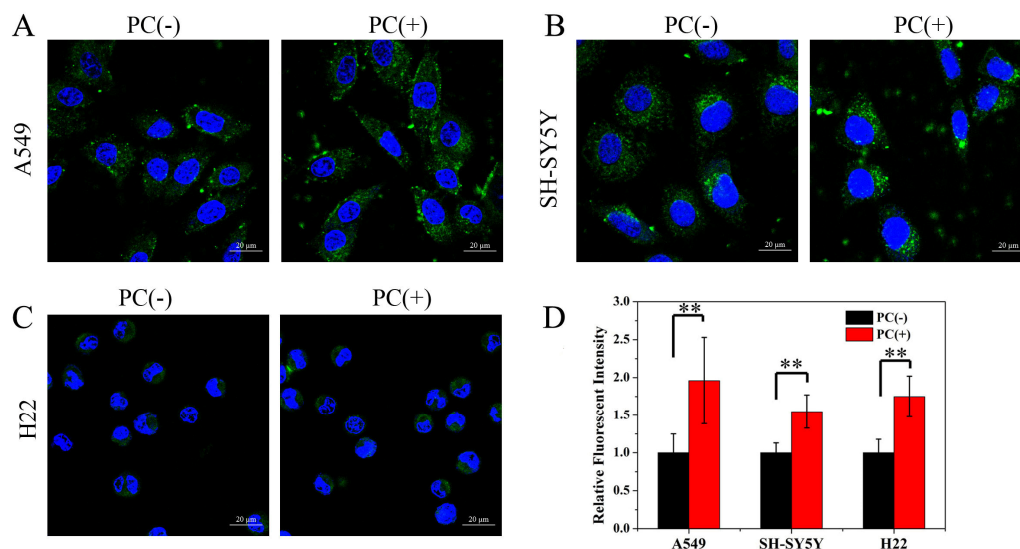

**Figure S12.** The CLSM images of A549 cells (A), SH-SY5Y cells (B) and H22 cells (C) after treated with PCM-PVPA-Pt NPs in the absence (-) or presence (+) of 3  $\mu$ M phosphocreatine (PC) at 37  $^{\circ}$ C for 4 h. (D) Quantitative data for the relative fluorescent intensity. (n = 10 in at least three different CLSM images, \*\* represents  $P < 0.01$ )

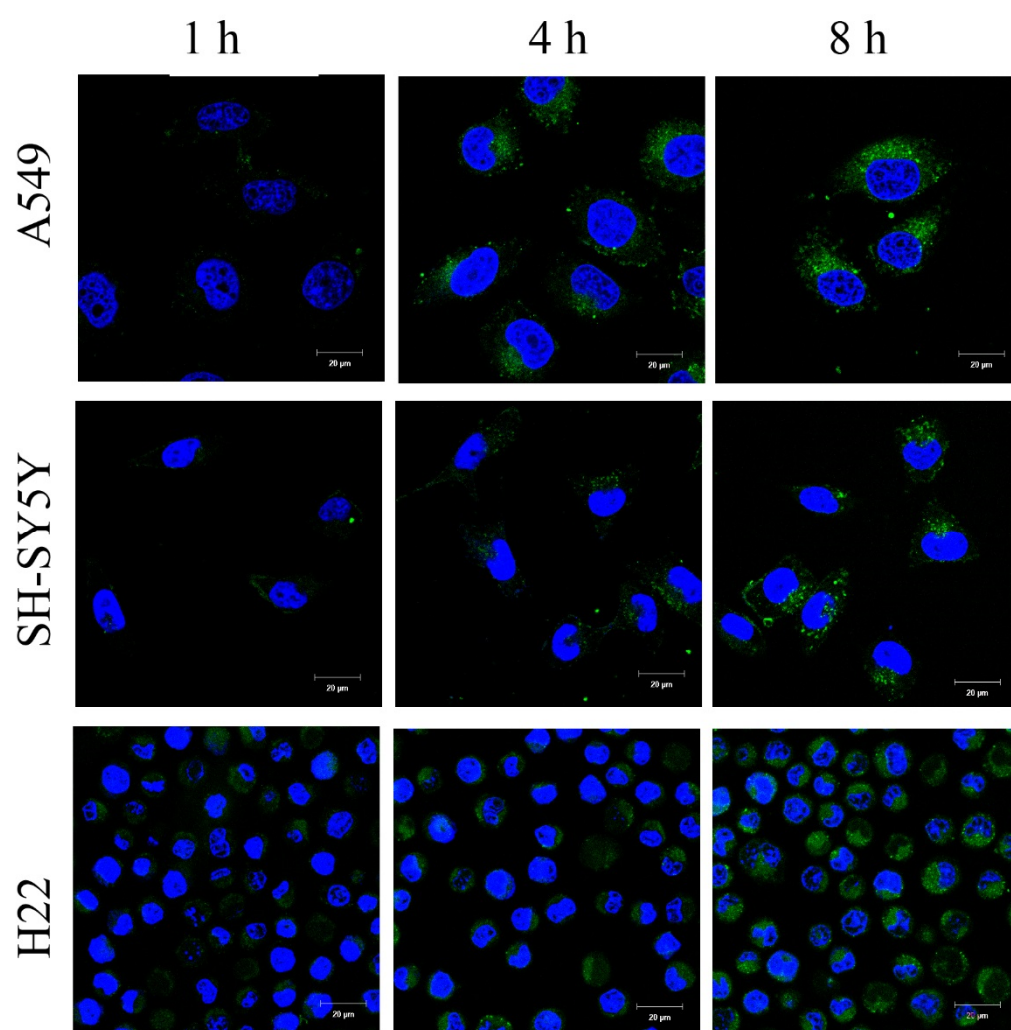

**Figure S13.** The CLSM images of A549 cells, SH-SY5Y cells and H22 cells after treated with FITC-labeled PCM-PVPA-Pt NPs at 37 °C for different time.

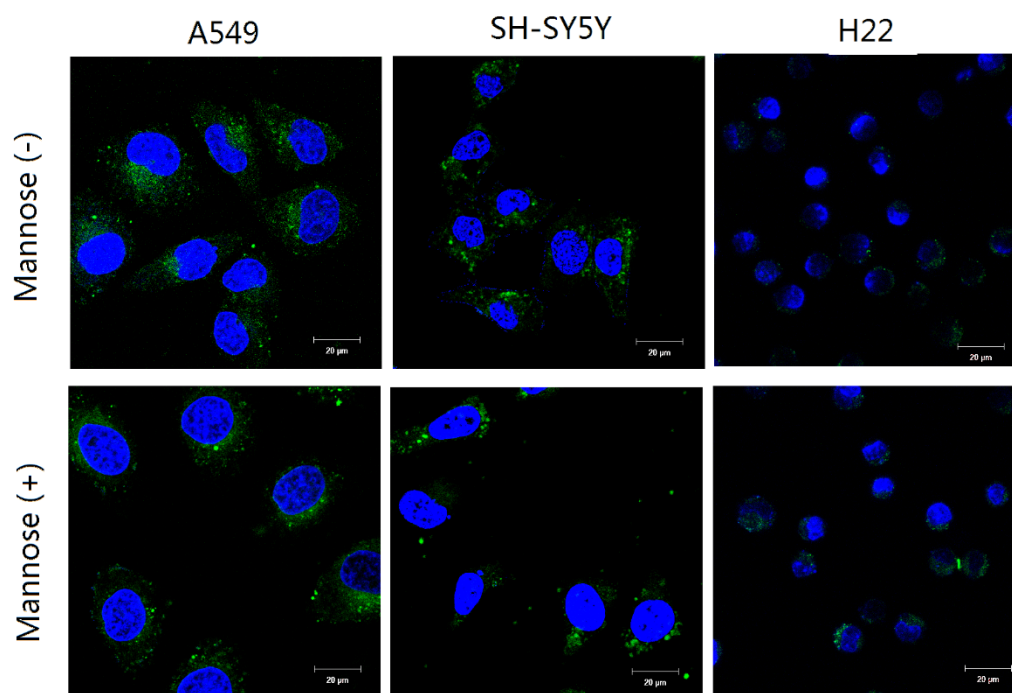

**Figure S14.** The CLSM images of A549 cells, SH-SY5Y cells and H22 cells after treated with FITC-labeled PCM-PVPA-Pt NPs at 37 °C for 4 h in the absence (-) or presence (+) of 600  $\mu$ M Mannose.

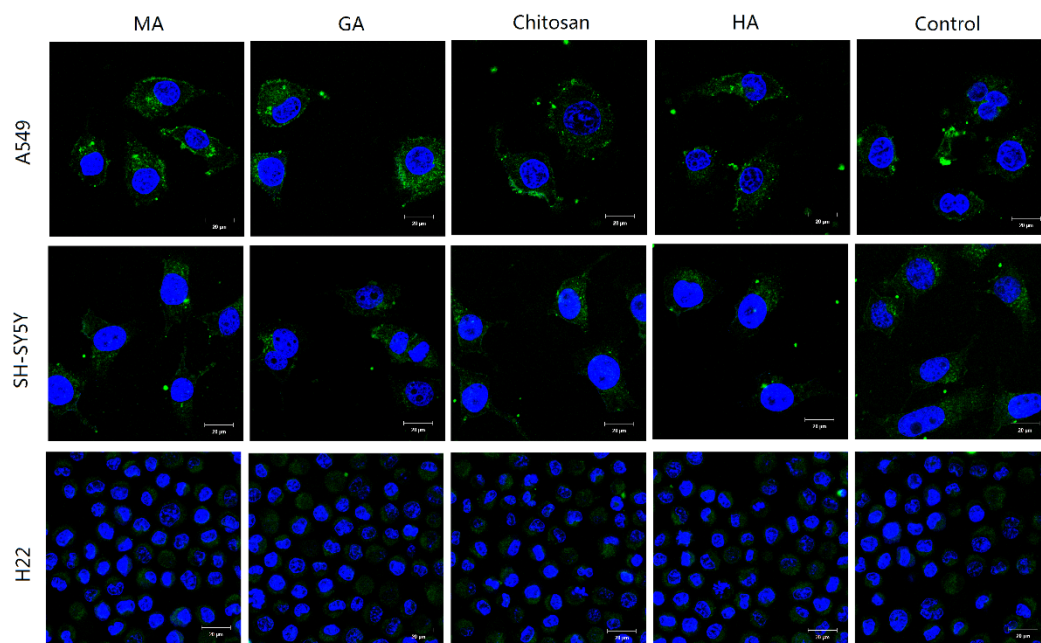

**Figure S15.** The CLSM images of A549 cells, SH-SY5Y cells and H22 cells after treated with FITC-labeled PCM-PVPA-Pt NPs at 37 °C for 4 h in the presence of D-mannosamine (MA), D-glucosamine (GA), chitosan, and hyaluronic acid (HA).

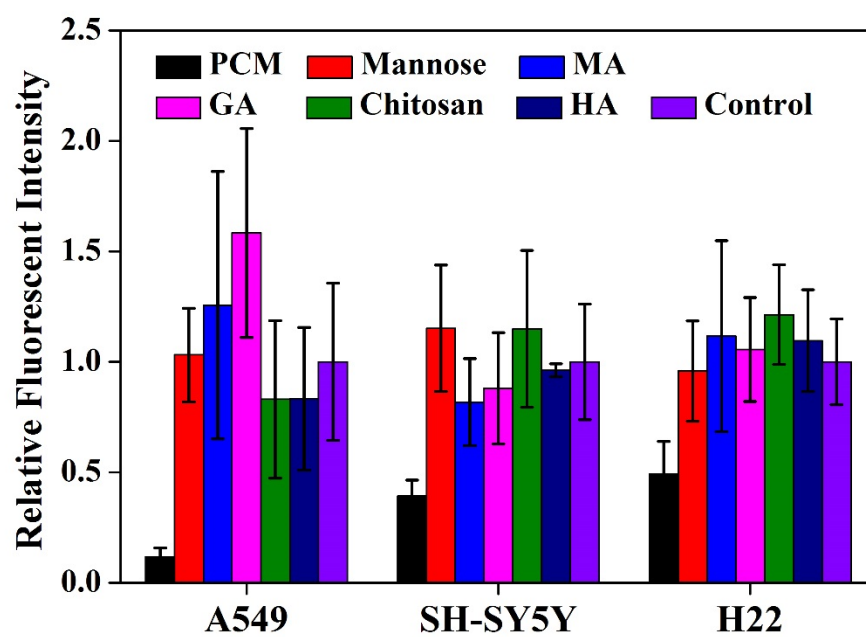

**Figure S16.** The quantification of fluorescent intensity in A549 cells, SH-SY5Y cells and H22 cells after incubated with FITC-labeled PCM-PVPA-Pt NPs at 37 °C for 4 h in the presence of various saccharides.

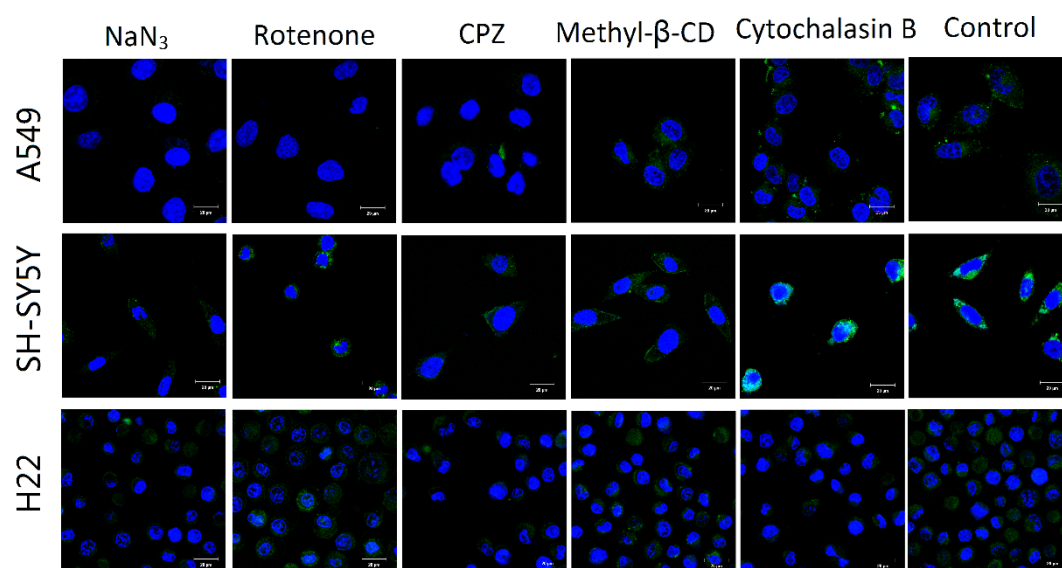

**Figure S17.** The CLSM images of A549 cells, SH-SY5Y cells and H22 cells after incubated with FITC-labeled PCM-PVPA-Pt NPs at 37 °C for 4 h in the presence of various endocytosis inhibitors.

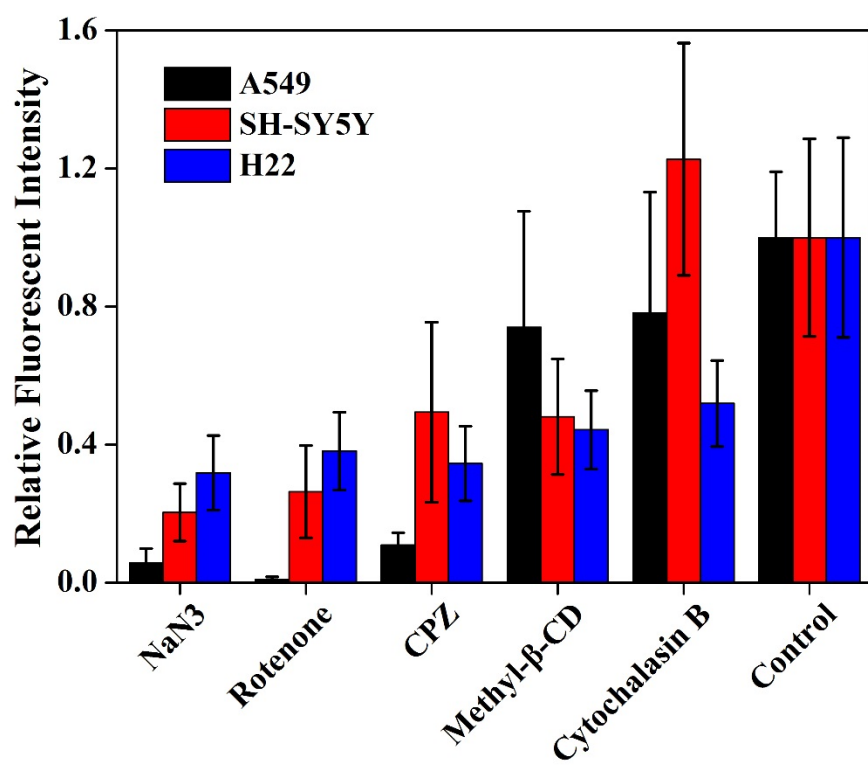

**Figure S18.** The quantification of fluorescent intensity in A549 cells, SH-SY5Y cells and H22 cells after incubated with FITC-labeled PCM-PVPA-Pt NPs at 37 °C for 4 h in the presence of various endocytosis inhibitors.

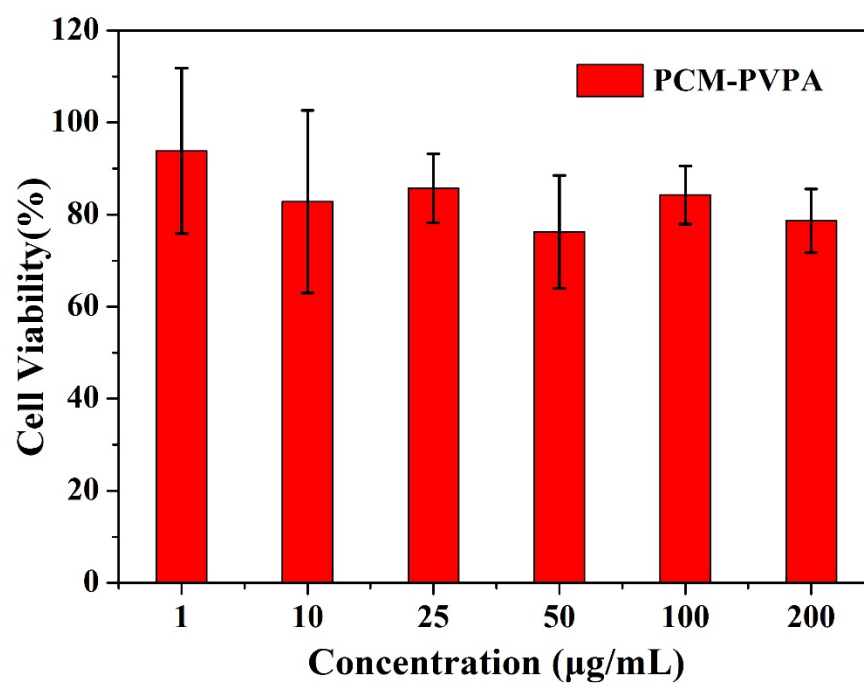

**Figure S19.** The *in vitro* A549 cell viability after treated with PCM-PVAP pseudo block polymer at 37 °C for 48 h on different polymer concentration.



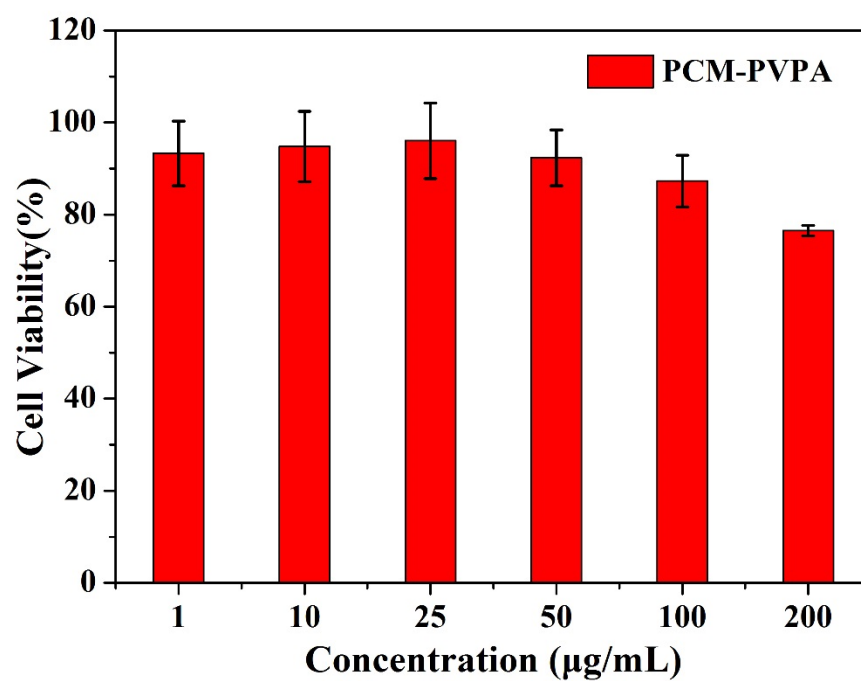

**Figure S20.** The *in vitro* SH-SY5Y cell viability after treated with PCM-PVAP pseudo block polymer at 37 °C for 48 h on different polymer concentration.

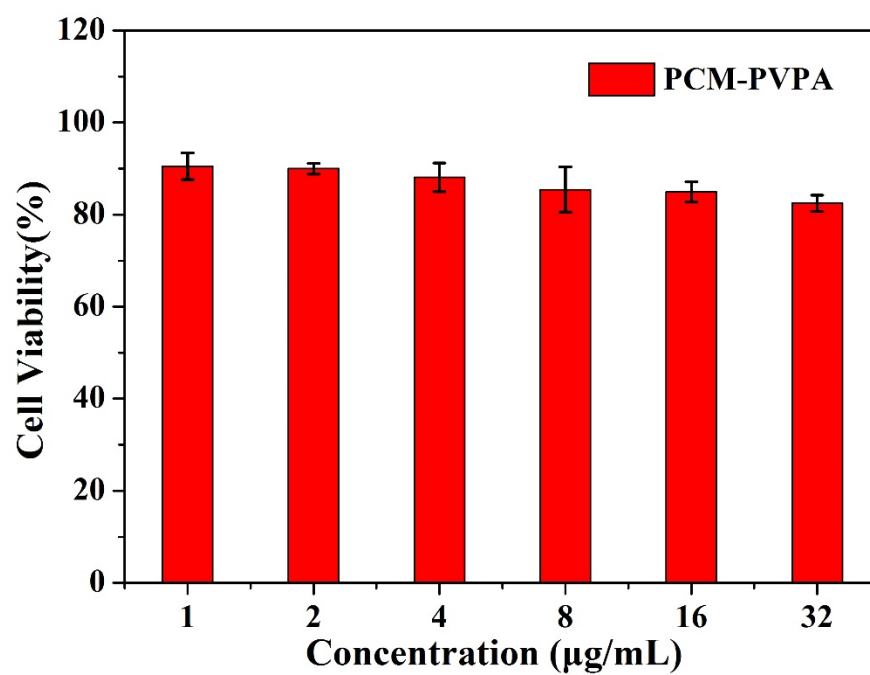

**Figure S21.** The *in vitro* H22 cell viability after treated with PCM-PVAP pseudo block polymer at 37 °C for 48 h on different polymer concentration.

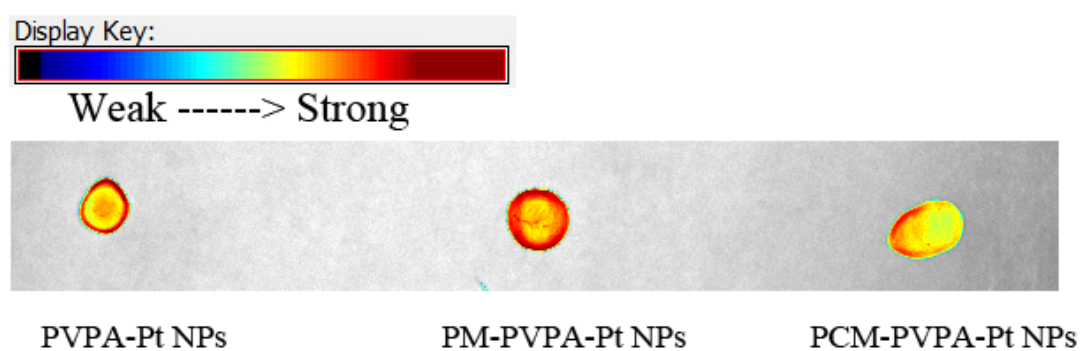

**Figure S22.** The NIRF images of same amount of NIR797-labeled nanoparticles.

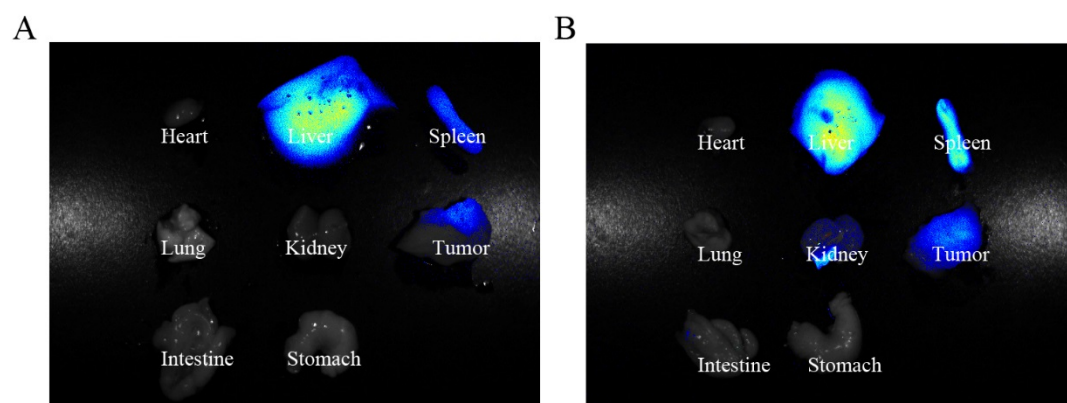

**Figure S23.** The NIRF images of the tumor and major organs from the mice treated with NIR797-labeled PVPA-Pt NPs (A) and PM-PVPA-Pt NPs (B) after the experiment.

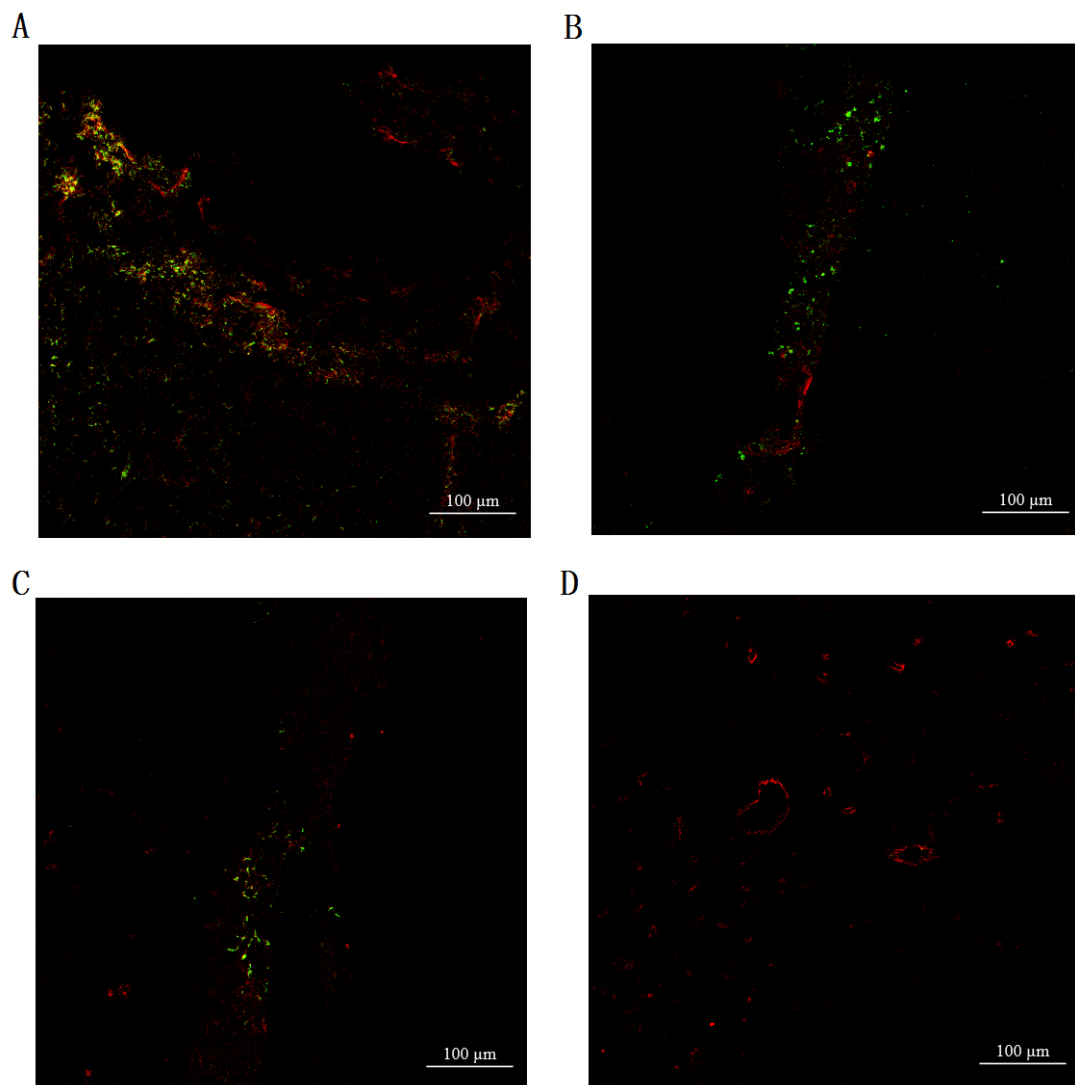

**Figure S24.** The CLSM images of H22-tumor tissues from the mice treated with FITC-labeled PCM-PVPA-Pt NPs for 12 h (A), 24 h (B), PM-PVPA-Pt NPs for 24 h (C), and PVPA-Pt NPs for 24 h (D).

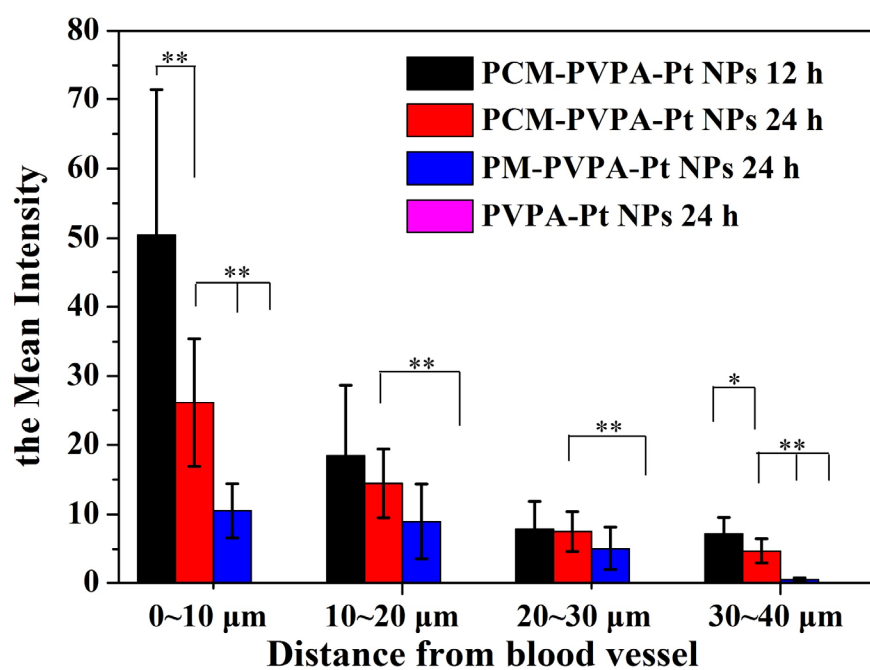

**Figure S25.** Quantitative relative intensity of these platinum-incorporating nanoparticles with distance from blood vessels. (about ten CLSM images were chosen for the quantitation of each formation, \* represents  $P < 0.05$ , \*\* represents  $P < 0.01$ )
